# Supplementary material
Source: PubMed Central journal article supplement (PMC4035944)
Supplement: 1316599111_pnas.201316599SI.pdf [file 1316599111_pnas.201316599SI.pdf]

# Supporting Information

Rathour and Narayanan 10.1073/pnas.1316599111

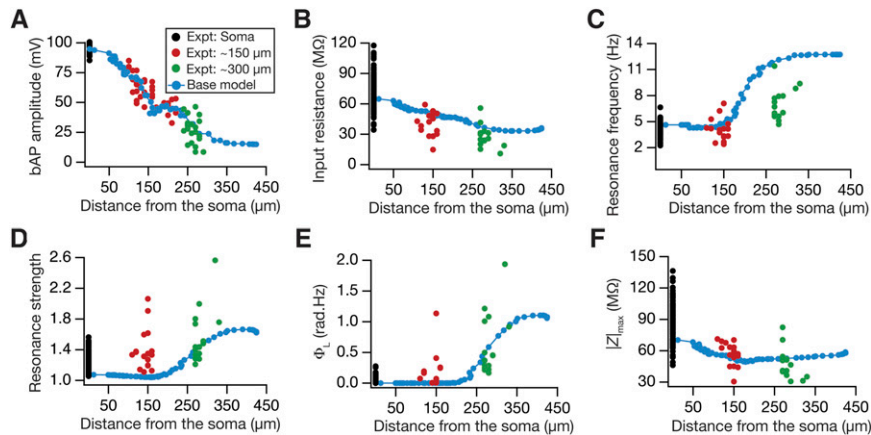

**Fig. S1.** The six functional maps in the base model match with corresponding experimental data. (A–F) Functional map of back-propagating action potential (bAP) (A), input resistance ( $R_{in}$ ) (B), resonance frequency ( $f_R$ ) (C), resonance strength ( $Q$ ) (D), total inductive phase ( $\Phi_L$ ) (E), and maximum impedance amplitude ( $|Z|_{max}$ ) (F) in the base model overlaid with corresponding experimental data.  $n = 28$  (soma), 35 (~150 μm), and 30 (~300 μm) for A, and  $n = 121$  (soma), 17 (~150 μm), and 15 (~300 μm) for B–F. The color codes for all panels follow the annotation provided in A; black, red, and green markers refer to experimental data (plotted with respective to corresponding distance values) at the soma, ~150 μm, and ~300 μm (compare Table S2); blue markers along with the solid line refer to the values obtained from the base model (same as corresponding plots in Fig. 1 F–H). The base model was obtained with default parameters mentioned in Table S1.

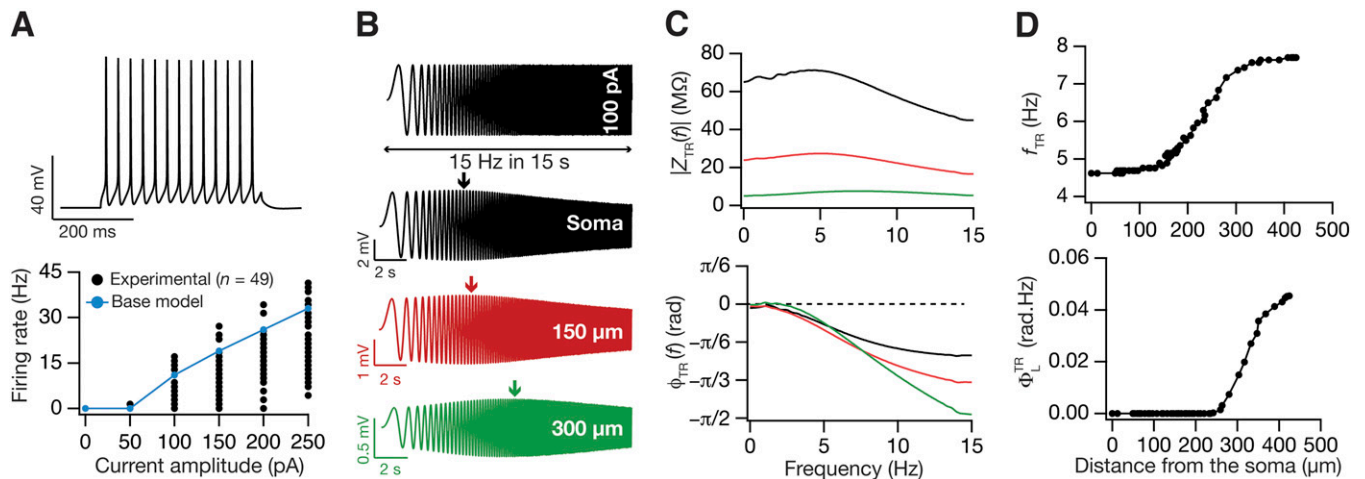

**Fig. S2.** Evaluation of unconstrained measurements in the base model. (A) *Upper*, action potential traces in response to 250-pA somatic current injection for 400 ms. *Lower*, somatic firing rate profile ( $f-I$  curve) in the base model (blue) overlaid with experimental  $f-I$  data (black) obtained from the CA1 pyramidal neurons. (B) A chirp current stimulus, 100 pA (peak-to-peak) in amplitude and frequency increasing linearly from 0.1 Hz to 15 Hz in 15 s (*Upper*), was injected at different locations, soma (black), ~150 μm (red), and ~300 μm (green), to get corresponding voltage responses at the soma (*Lower*). (C) Impedance amplitude profile [ $|Z_{TR}(f)|$ ] (*Upper*) and impedance phase profile [ $\phi_{TR}(f)$ ] (*Lower*) obtained from the voltage response to the chirp stimulus, shown in B. (D) Functional map corresponding to transfer resonance frequency ( $f_{TR}$ ) (*Upper*) and transfer total inductive phase  $\phi_L^{TR}$  (*Lower*) along the trunk. Note that the base model was constrained for physiological properties in Fig. 1 and measurements here matched with their experimental counterparts, without being explicitly constrained.

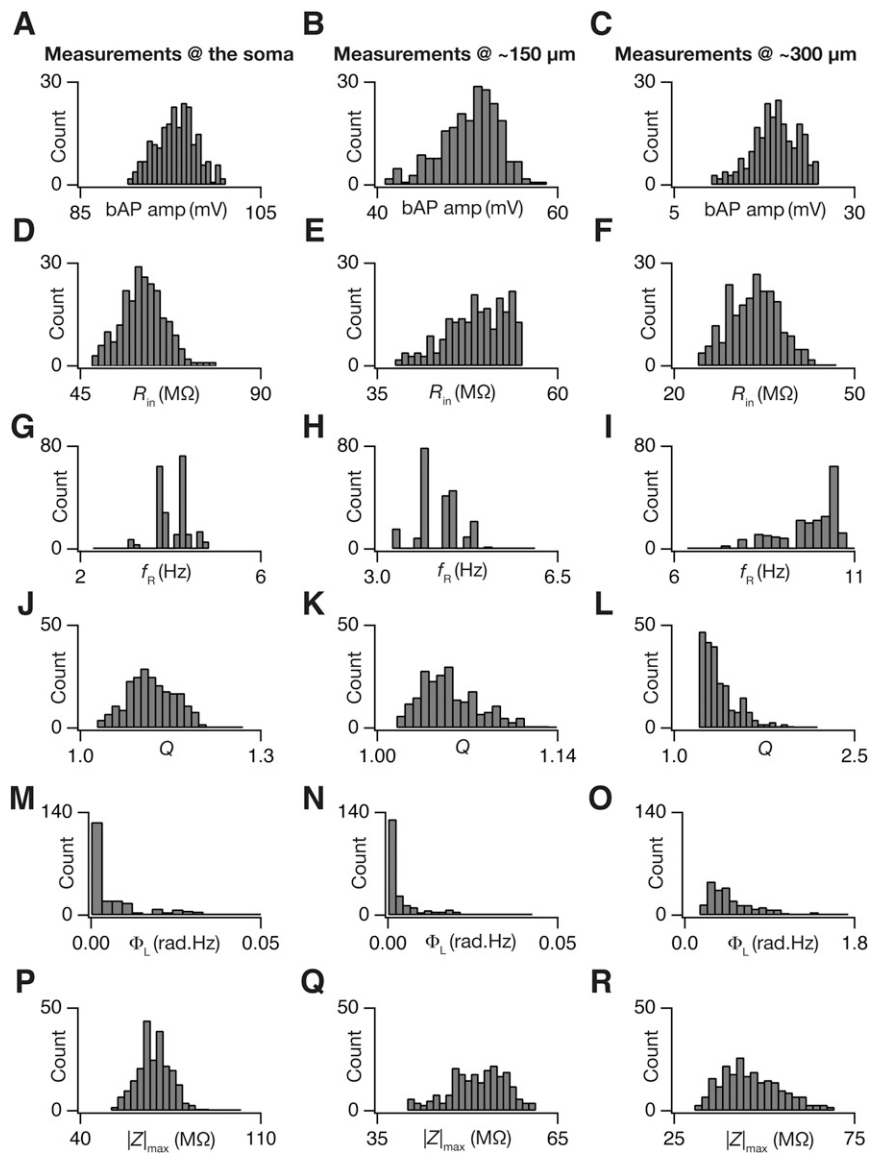

**Fig. S3.** Distribution of physiologically relevant measurements in the population of valid neuronal models at different locations. (A–C) Distribution of back propagation of action potential (bAP) amplitude in the population of valid models at the soma (A),  $\sim 150 \mu\text{m}$  (B), and  $\sim 300 \mu\text{m}$  (C). (D–F) Distribution of input resistance,  $R_{in}$ , in the population of valid models at the soma (D),  $\sim 150 \mu\text{m}$  (E), and  $\sim 300 \mu\text{m}$  (F). (G–I) Distribution of resonance frequency  $f_R$ , in the population of valid models at the soma (G),  $\sim 150 \mu\text{m}$  (H), and  $\sim 300 \mu\text{m}$  (I). (J–L) Distribution of resonance strength,  $Q$ , in the population of valid models at the soma (J),  $\sim 150 \mu\text{m}$  (K), and  $\sim 300 \mu\text{m}$  (L). (M–O) Distribution of total inductive phase,  $\Phi_L$ , in the population of valid models at the soma (M),  $\sim 150 \mu\text{m}$  (N), and  $\sim 300 \mu\text{m}$  (O). (P–R) Distribution of maximum impedance amplitude,  $|Z|_{max}$ , in the population of valid models at the soma (P),  $\sim 150 \mu\text{m}$  (Q), and  $\sim 300 \mu\text{m}$  (R). For all panels  $n = 228$ .



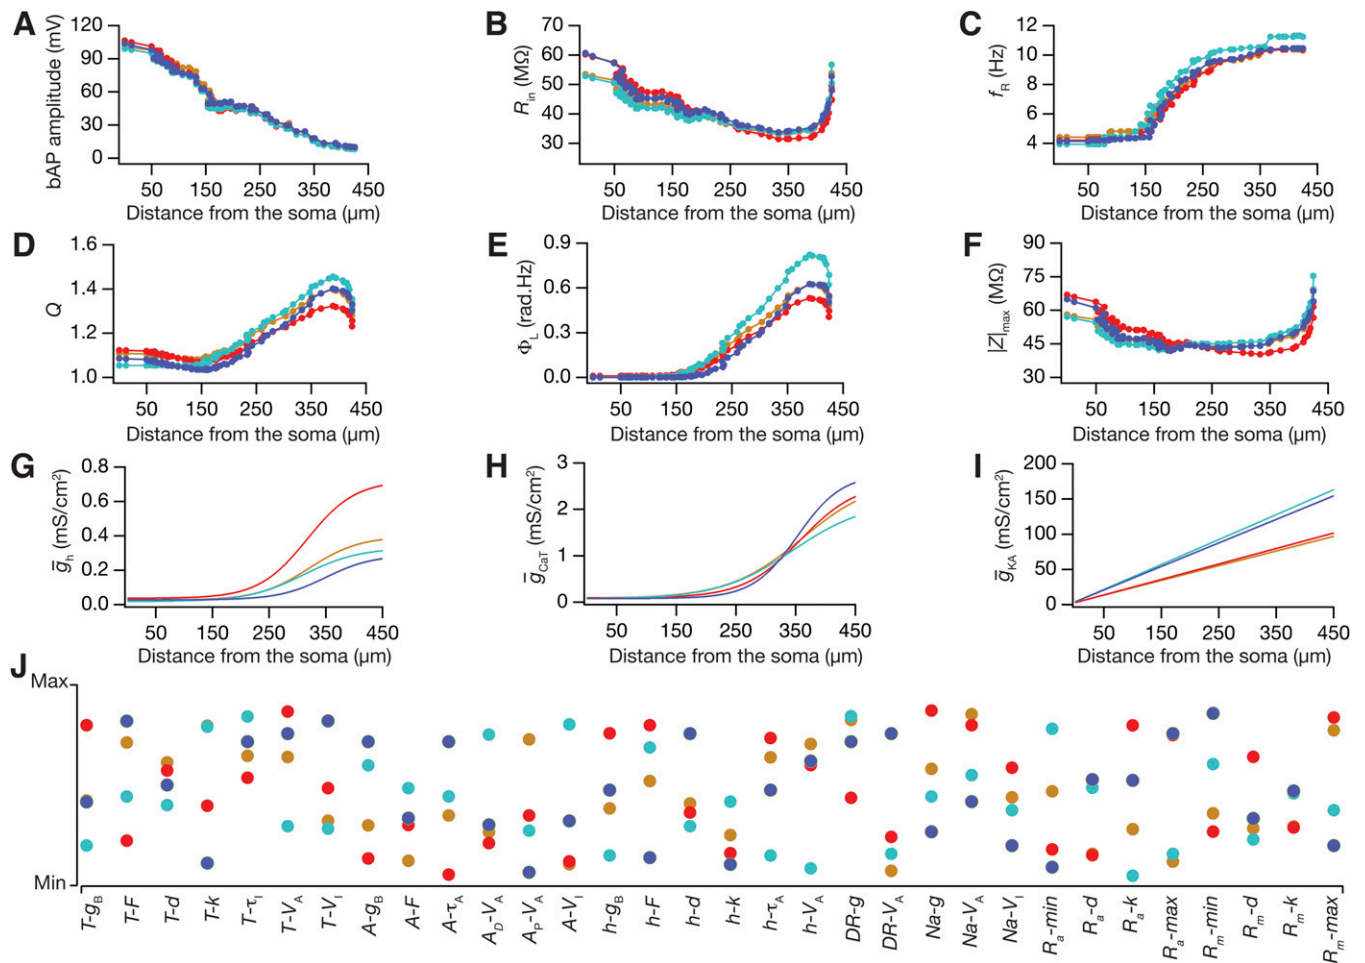

**Fig. S5.** In four randomly chosen valid models, analogous functional maps of all six measurements emerged in the absence of individual channelostasis in the underlying channel population. (A–F) Functional maps of back-propagating action potential (bAP) amplitude (A), input resistance ( $R_{in}$ ) (B), resonance frequency ( $f_R$ ) (C), resonance strength ( $Q$ ) (D), total inductive phase ( $\Phi_L$ ) (E), and maximum impedance amplitude ( $|Z|_{max}$ ) (F) represented along the somato-apical topograph of four valid models. (G–I) Distribution of  $h$  (G), CaT (H), and KA (I) conductances along the somato-apical trunk of the five valid models. (J) Distribution of all underlying model parameters in the five valid model neurons depicted along with their respective minimum–maximum range. Each colored circle represents parameters of the color-matched model depicted in A–I. Note that these valid models were obtained with global sensitivity analysis on the new base model (Fig. S4) and with parametric ranges provided in Table S5. A total of 9,000 random models were generated by uniformly sampling 32 parameters with ranges shown in Table S4 (same set of parameters as in Table S1 for the base model, but with different ranges to account for the new base model parameters). The validity of these randomly generated models was tested by comparing 18 measurements with their experimental counterparts (measurements and bounds are the same as before, in Table S3), and 27 models were declared valid.



**Table S1. Parameters, their default values, and testing ranges for generating randomized models**

| Count                                                     | Parameter                                                     | Symbol           | Default value | Testing range |
|-----------------------------------------------------------|---------------------------------------------------------------|------------------|---------------|---------------|
| <b>T-type Ca<sup>2+</sup> channel properties</b>          |                                                               |                  |               |               |
| 1                                                         | Maximal conductance, $\mu\text{S}/\text{cm}^2$                | $T-g_B$          | 55            | 40–70         |
| 2                                                         | Fold increase                                                 | $T-F$            | 25            | 20–30         |
| 3                                                         | Half-maximal point of $g_{\text{CaT}}$ sigmoid, $\mu\text{m}$ | $T-d$            | 370           | 330–410       |
| 4                                                         | Slope of $g_{\text{CaT}}$ sigmoid, $\mu\text{m}$              | $T-k$            | 15            | 5–25          |
| 5                                                         | Inactivation time constant, ms                                | $T-\tau_I$       | 31.012        | 10–50         |
| 6                                                         | $V_{1/2}$ activation, mV                                      | $T-V_A$          | –60           | –50 to –70    |
| 7                                                         | $V_{1/2}$ inactivation, mV                                    | $T-V_I$          | –85           | –75 to –95    |
| <b>A-type K<sup>+</sup> channel properties</b>            |                                                               |                  |               |               |
| 8                                                         | Maximal conductance, $\text{mS}/\text{cm}^2$                  | $A-g_B$          | 3.1           | 2.6–3.7       |
| 9                                                         | Fold increase per 100 $\mu\text{m}$                           | $A-F$            | 5             | 4–6           |
| 10                                                        | Activation time constant KA, ms                               | $A-\tau_A$       | 0.032         | 0.02–0.1      |
| 11                                                        | $V_{1/2}$ activation $\text{K}A_{\text{distr}}$ , mV          | $A_D-V_A$        | –1            | –5–5          |
| 12                                                        | $V_{1/2}$ activation $\text{K}A_{\text{prox}}$ , mV           | $A_P-V_A$        | 11            | 5–15          |
| 13                                                        | $V_{1/2}$ inactivation KA, mV                                 | $A-V_I$          | –56           | –60 to –50    |
| <b>h channel properties</b>                               |                                                               |                  |               |               |
| 14                                                        | Maximal conductance, $\mu\text{S}/\text{cm}^2$                | $h-g_B$          | 40            | 30–55         |
| 15                                                        | Fold increase                                                 | $h-F$            | 20            | 15–25         |
| 16                                                        | Half-maximal point of $g_h$ sigmoid, $\mu\text{m}$            | $h-d$            | 370           | 330–410       |
| 17                                                        | Slope of $g_h$ sigmoid, $\mu\text{m}$                         | $h-k$            | 14            | 10–20         |
| 18                                                        | Activation time constant of $I_h$ , ms                        | $h-\tau_A$       | 33.089        | 25–75         |
| 19                                                        | $V_{1/2}$ activation of $I_h$ , mV                            | $h-V_A$          | –82           | –75 to –90    |
| <b>Delayed rectified K<sup>+</sup> channel properties</b> |                                                               |                  |               |               |
| 20                                                        | Maximal conductance, $\text{mS}/\text{cm}^2$                  | $DR-g$           | 10            | 7–13          |
| 21                                                        | $V_{1/2}$ activation, mV                                      | $DR-V_A$         | 13            | 5–20          |
| <b>Fast Na<sup>+</sup> channel properties</b>             |                                                               |                  |               |               |
| 22                                                        | Maximal conductance, $\text{mS}/\text{cm}^2$                  | $Na-g$           | 12.5          | 11–14         |
| 23                                                        | $V_{1/2}$ activation, mV                                      | $Na-V_A$         | –38           | –30 to –45    |
| 24                                                        | $V_{1/2}$ inactivation, mV                                    | $Na-V_I$         | –50           | –40 to –60    |
| <b><math>R_a</math> distribution</b>                      |                                                               |                  |               |               |
| 25                                                        | Minimum value, $\Omega\text{-cm}$                             | $R_a\text{-min}$ | 10            | 5–15          |
| 26                                                        | Half-maximal point of $R_a$ sigmoid, $\mu\text{m}$            | $R_a\text{-d}$   | 320           | 300–340       |
| 27                                                        | Slope of $R_a$ sigmoid, $\mu\text{m}$                         | $R_a\text{-k}$   | 14            | 10–20         |
| 28                                                        | Maximum value, $\Omega\text{-cm}$                             | $R_a\text{-max}$ | 110           | 90–130        |
| <b><math>R_m</math> distribution</b>                      |                                                               |                  |               |               |
| 29                                                        | Minimum value, $\text{k}\Omega\text{-cm}^2$                   | $R_m\text{-min}$ | 125           | 105–145       |
| 30                                                        | Half-maximal point of $R_m$ sigmoid, $\mu\text{m}$            | $R_m\text{-d}$   | 320           | 290–350       |
| 31                                                        | Slope of $R_m$ sigmoid, $\mu\text{m}$                         | $R_m\text{-k}$   | 40            | 20–60         |
| 32                                                        | Maximum value, $\text{k}\Omega\text{-cm}^2$                   | $R_m\text{-max}$ | 145           | 125–165       |

**Table S2. Experimental measurements obtained from hippocampal CA1 pyramidal neurons**

| Location          | bAP, mV         | $R_{in}$ , $\text{M}\Omega$ | $f_R$ , Hz     | $Q$             | $\Phi_L$ , rad.Hz | $ Z _{\text{max}}$ , $\text{M}\Omega$ | $n$ | Distance, $\mu\text{m}$ |
|-------------------|-----------------|-----------------------------|----------------|-----------------|-------------------|---------------------------------------|-----|-------------------------|
| Soma              | $94.6 \pm 0.77$ | $73.1 \pm 1.5$              | $4.2 \pm 0.06$ | $1.23 \pm 0.01$ | $0.05 \pm 0.004$  | $86.9 \pm 1.5$                        | 121 | 0                       |
| 150 $\mu\text{m}$ | $59.2 \pm 2.07$ | $39.9 \pm 2.9$              | $4.0 \pm 0.3$  | $1.4 \pm 0.1$   | $0.2 \pm 0.1$     | $57.1 \pm 2.7$                        | 17  | $143 \pm 3.6$           |
| 300 $\mu\text{m}$ | $26.4 \pm 1.82$ | $27.3 \pm 2.8$              | $7.1 \pm 0.5$  | $1.6 \pm 0.1$   | $0.6 \pm 0.1$     | $47.8 \pm 3.7$                        | 15  | $283 \pm 4.8$           |

All data are presented as mean  $\pm$  SEM. Number of experimental data points ( $n$ ) and corresponding recording locations (Distance,  $\mu\text{m}$ ) apply to all measurements except for bAP. Number of experimental data points and corresponding recording locations for bAP are as follows: 28 (soma), 35 ( $149.4 \pm 6.5 \mu\text{m}$ ), and 30 ( $262 \pm 2.4 \mu\text{m}$ ).



**Table S3. Bounds for all 18 measurements for declaring a model to be valid**

| Measurement                                                 | Soma  |       | ~150 $\mu\text{m}$ |       | ~300 $\mu\text{m}$ |       |
|-------------------------------------------------------------|-------|-------|--------------------|-------|--------------------|-------|
|                                                             | Lower | Upper | Lower              | Upper | Lower              | Upper |
| bAP Amplitude, mV                                           | 90    | 105   | 40                 | 70    | 10                 | 25    |
| Input resistance, $R_{in}$ , $\text{M}\Omega$               | 45    | 90    | 30                 | 55    | 10                 | 50    |
| Resonance frequency, $f_R$ , Hz                             | 2     | 5.5   | 3                  | 6.5   | 5                  | 11    |
| Resonance strength, $Q$                                     | 1.01  | 1.5   | 1.01               | 1.9   | 1.2                | 2.6   |
| Total inductive phase, $\Phi_L$ , rad Hz                    | 0     | 0.15  | 0                  | 0.3   | 0.15               | 2     |
| Maximum impedance amplitude, $ Z _{max}$ , $\text{M}\Omega$ | 50    | 110   | 35                 | 80    | 30                 | 70    |

The bounds were fixed such that they cover ~80% of the experimental variability in the corresponding measurement (Fig. S1).

**Table S4. Parameters, their default values, and testing ranges for generating randomized models**

| Count                                                               | Parameter                                                     | Symbol           | Default value | Testing range  |
|---------------------------------------------------------------------|---------------------------------------------------------------|------------------|---------------|----------------|
| <b>T-type <math>\text{Ca}^{2+}</math> channel properties</b>        |                                                               |                  |               |                |
| 1                                                                   | Maximal conductance, $\mu\text{S}/\text{cm}^2$                | $T-g_B$          | <b>80</b>     | <b>65–95</b>   |
| 2                                                                   | Fold increase                                                 | $T-F$            | <b>30</b>     | <b>25–35</b>   |
| 3                                                                   | Half-maximal point of $g_{\text{CaT}}$ sigmoid, $\mu\text{m}$ | $T-d$            | <b>350</b>    | <b>320–380</b> |
| 4                                                                   | Slope of $g_{\text{CaT}}$ sigmoid, $\mu\text{m}$              | $T-k$            | <b>50</b>     | <b>35–65</b>   |
| 5                                                                   | Inactivation time constant, ms                                | $T-\tau_1$       | 31.012        | 10–50          |
| 6                                                                   | $V_{1/2}$ activation, mV                                      | $T-V_A$          | -60           | -50 to -70     |
| 7                                                                   | $V_{1/2}$ inactivation, mV                                    | $T-V_I$          | -85           | -75 to -95     |
| <b>A-type <math>\text{K}^+</math> channel properties</b>            |                                                               |                  |               |                |
| 8                                                                   | Maximal conductance, $\text{mS}/\text{cm}^2$                  | $A-g_B$          | 3.1           | 2.6–4.5        |
| 9                                                                   | Fold increase per 100 $\mu\text{m}$                           | $A-F$            | <b>8</b>      | <b>6–12</b>    |
| 10                                                                  | Activation time constant $K_A$ , ms                           | $A-\tau_A$       | 0.032         | 0.02–0.1       |
| 11                                                                  | $V_{1/2}$ activation $K_{A_{\text{distr}}}$ , mV              | $A_D-V_A$        | -1            | -5–5           |
| 12                                                                  | $V_{1/2}$ activation $K_{A_{\text{prox}}}$ , mV               | $A_P-V_A$        | 11            | 5–15           |
| 13                                                                  | $V_{1/2}$ inactivation $K_A$ , mV                             | $A-V_I$          | -56           | -60 to -50     |
| <b><math>h</math> channel properties</b>                            |                                                               |                  |               |                |
| 14                                                                  | Maximal conductance, $\mu\text{S}/\text{cm}^2$                | $h-g_B$          | <b>25</b>     | <b>15–40</b>   |
| 15                                                                  | Fold increase                                                 | $h-F$            | <b>12</b>     | <b>8–20</b>    |
| 16                                                                  | Half-maximal point of $g_h$ sigmoid, $\mu\text{m}$            | $h-d$            | <b>320</b>    | <b>290–360</b> |
| 17                                                                  | Slope of $g_h$ sigmoid, $\mu\text{m}$                         | $h-k$            | <b>50</b>     | <b>40–60</b>   |
| 18                                                                  | Activation time constant of $I_h$ , ms                        | $h-\tau_A$       | 33.089        | 25–75          |
| 19                                                                  | $V_{1/2}$ activation of $I_h$ , mV                            | $h-V_A$          | -82           | -75 to -90     |
| <b>Delayed rectified <math>\text{K}^+</math> channel properties</b> |                                                               |                  |               |                |
| 20                                                                  | Maximal conductance, $\text{mS}/\text{cm}^2$                  | $DR-g$           | 10            | 8–14           |
| 21                                                                  | $V_{1/2}$ activation, mV                                      | $DR-V_A$         | 13            | 5–20           |
| <b>Fast <math>\text{Na}^+</math> channel properties</b>             |                                                               |                  |               |                |
| 22                                                                  | Maximal conductance, $\text{mS}/\text{cm}^2$                  | $Na-g$           | <b>16</b>     | <b>14–23</b>   |
| 23                                                                  | $V_{1/2}$ activation, mV                                      | $Na-V_A$         | -38           | -34 to -42     |
| 24                                                                  | $V_{1/2}$ inactivation, mV                                    | $Na-V_I$         | -50           | -40 to -60     |
| <b><math>R_a</math> distribution</b>                                |                                                               |                  |               |                |
| 25                                                                  | Minimum value, $\Omega\text{-cm}$                             | $R_a\text{-min}$ | <b>70</b>     | <b>55–85</b>   |
| 26                                                                  | Half-maximal point of $R_a$ sigmoid, $\mu\text{m}$            | $R_a\text{-d}$   | <b>300</b>    | <b>270–330</b> |
| 27                                                                  | Slope of $R_a$ sigmoid, $\mu\text{m}$                         | $R_a\text{-k}$   | <b>50</b>     | <b>40–60</b>   |
| 28                                                                  | Maximum value, $\Omega\text{-cm}$                             | $R_a\text{-max}$ | <b>120</b>    | <b>100–140</b> |
| <b><math>R_m</math> distribution</b>                                |                                                               |                  |               |                |
| 29                                                                  | Minimum value, $\text{k}\Omega\text{-cm}^2$                   | $R_m\text{-min}$ | <b>85</b>     | <b>70–100</b>  |
| 30                                                                  | Half-maximal point of $R_m$ sigmoid, $\mu\text{m}$            | $R_m\text{-d}$   | <b>300</b>    | <b>270–330</b> |
| 31                                                                  | Slope of $R_m$ sigmoid, $\mu\text{m}$                         | $R_m\text{-k}$   | <b>50</b>     | <b>30–70</b>   |
| 32                                                                  | Maximum value, $\text{k}\Omega\text{-cm}^2$                   | $R_m\text{-max}$ | <b>125</b>    | <b>110–140</b> |

Default values and testing ranges of parameters in boldface type are different from those of the previous base model (compare Table S1).
